# Supplementary material
Source: PubMed Central journal article supplement (PMC6191320)

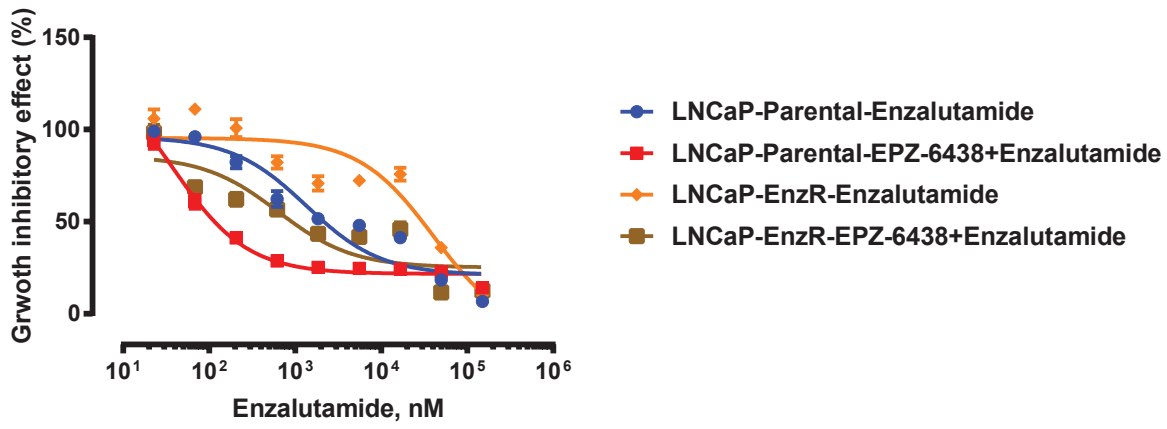

**A**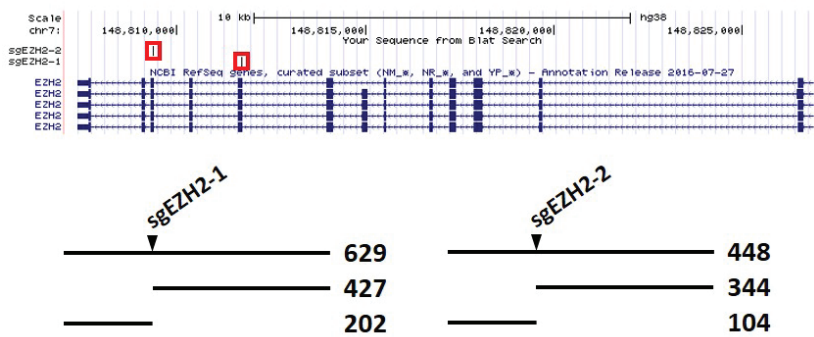**B**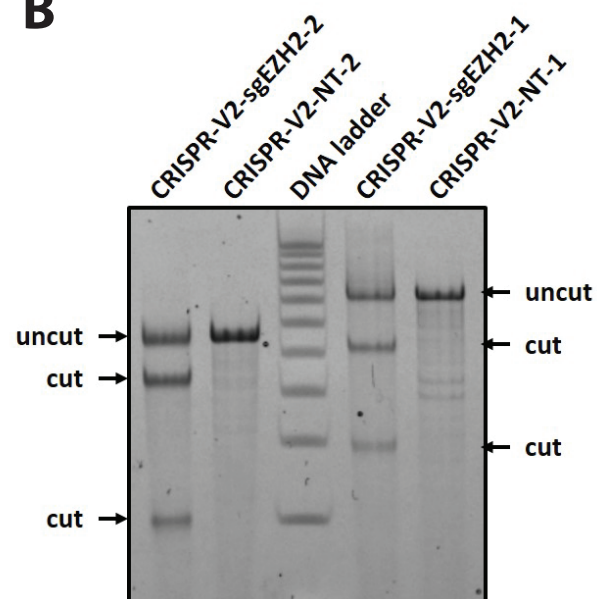**C**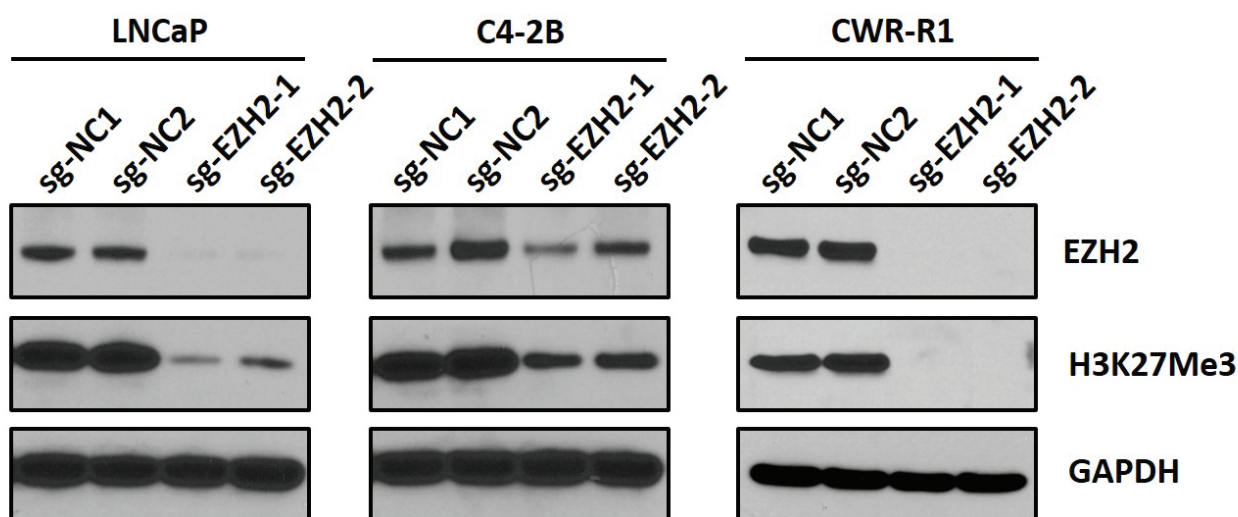**D**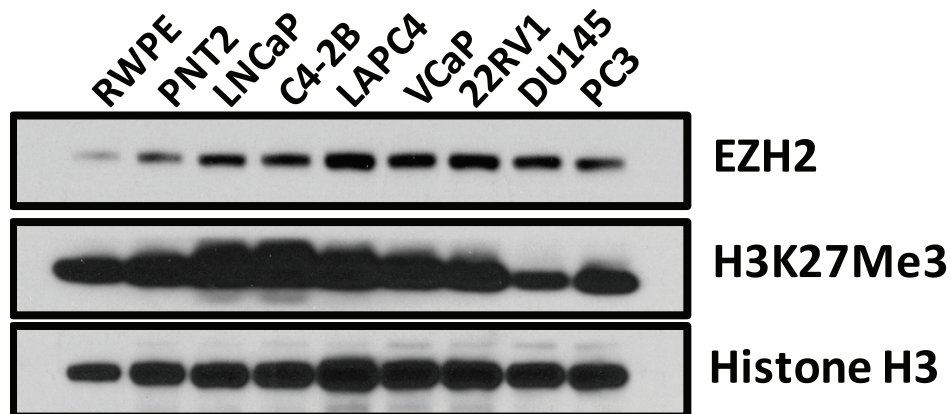

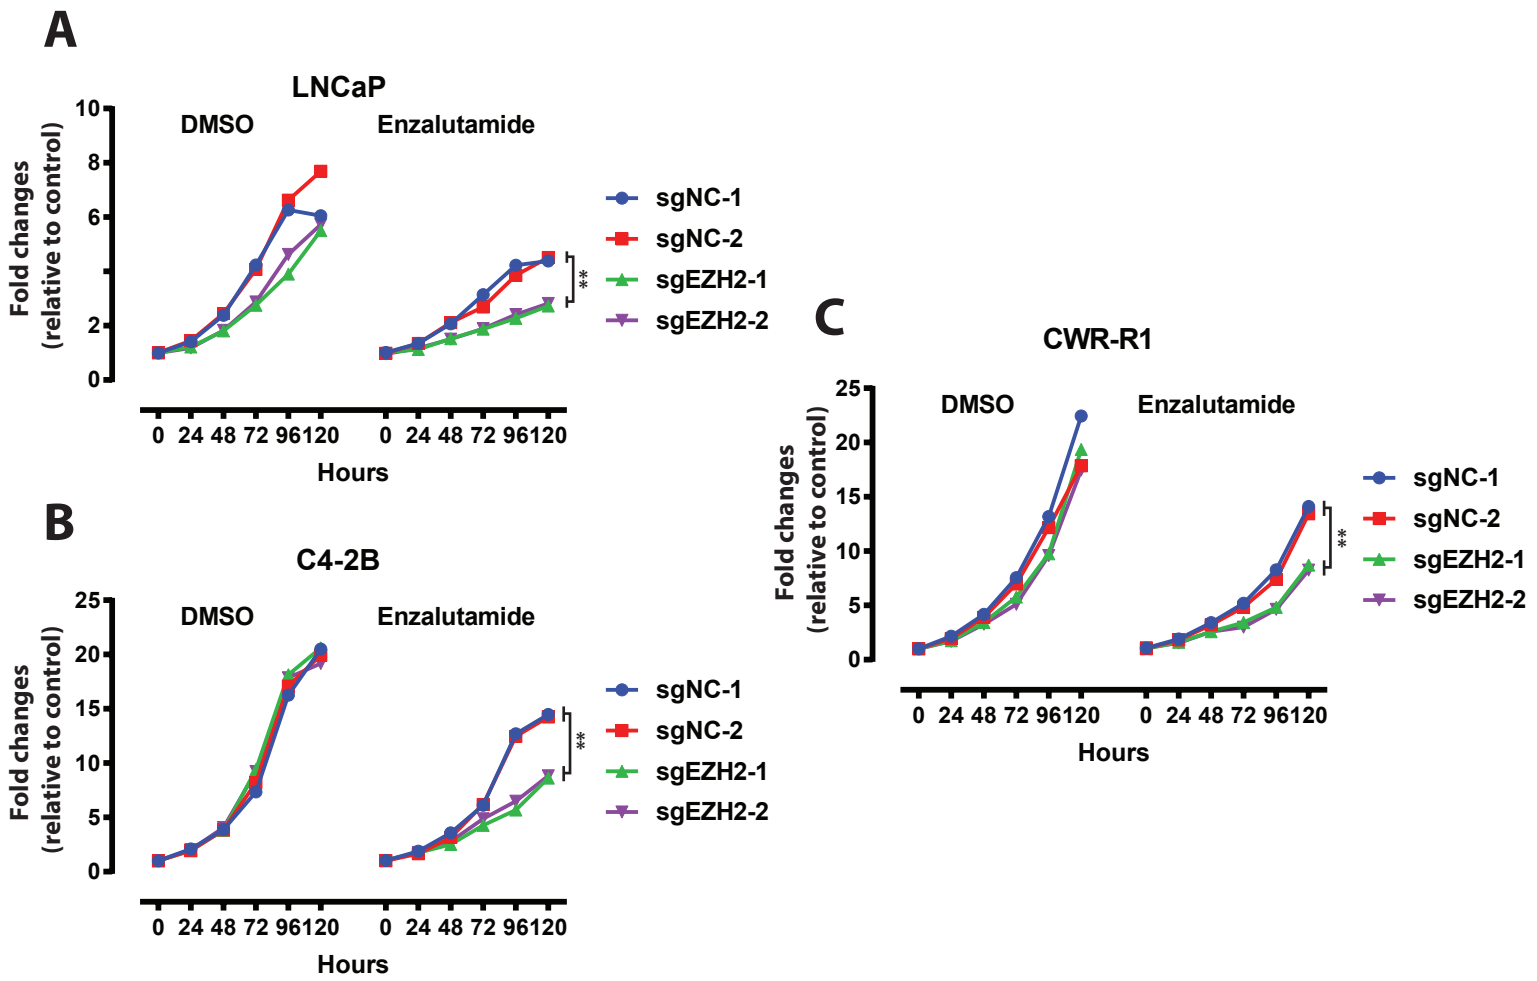

**A**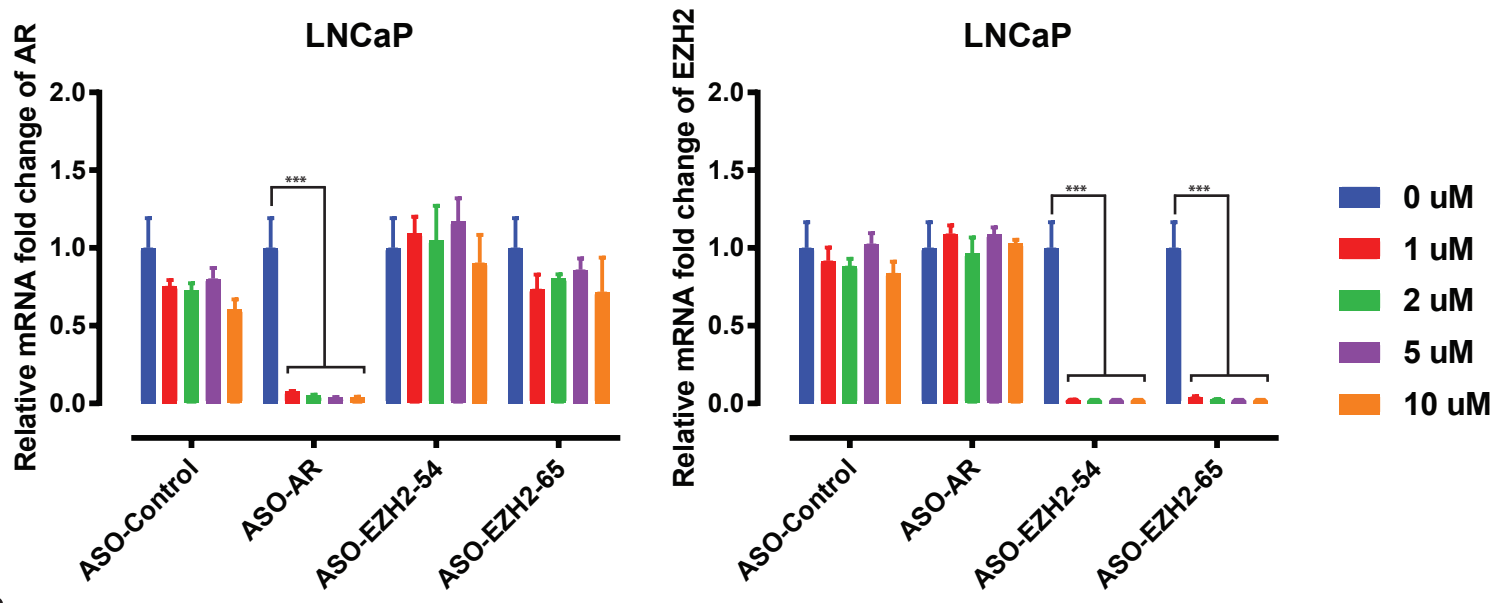**B**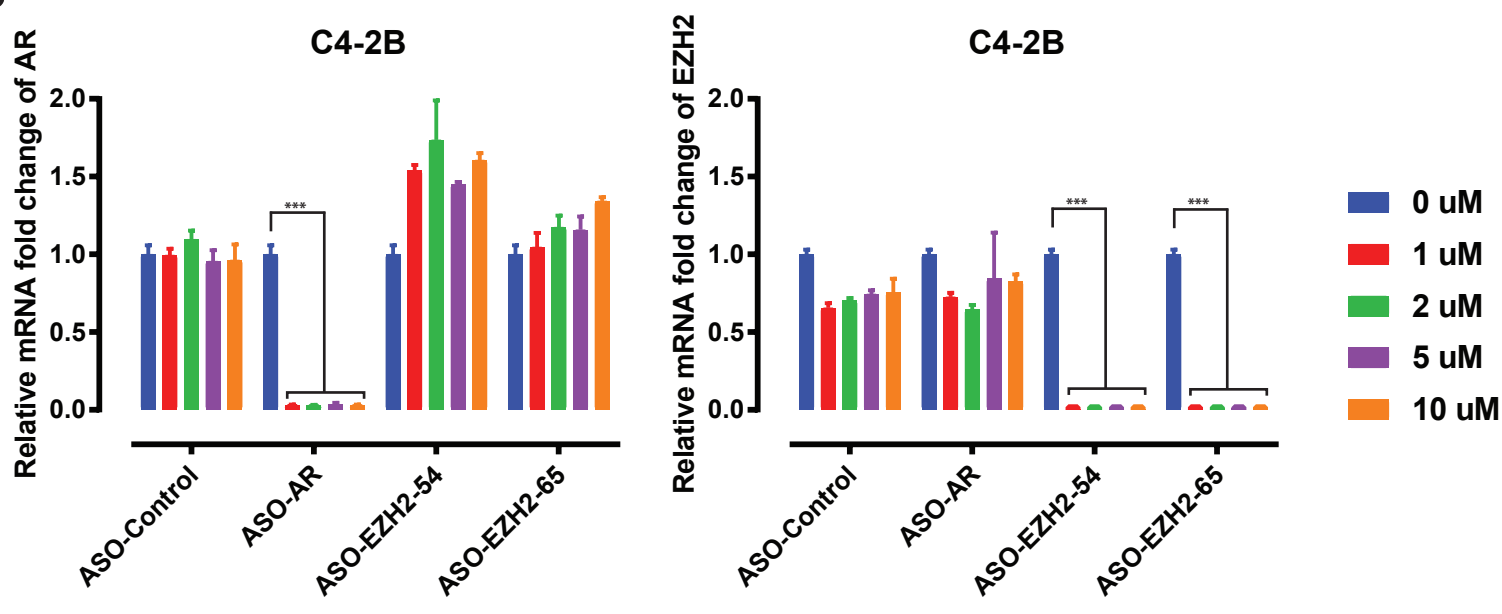

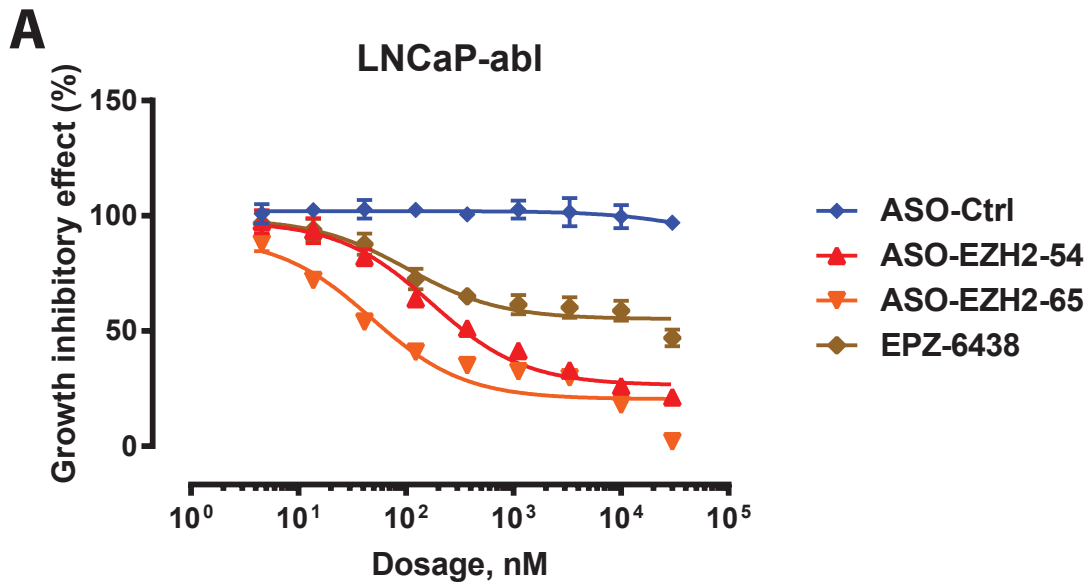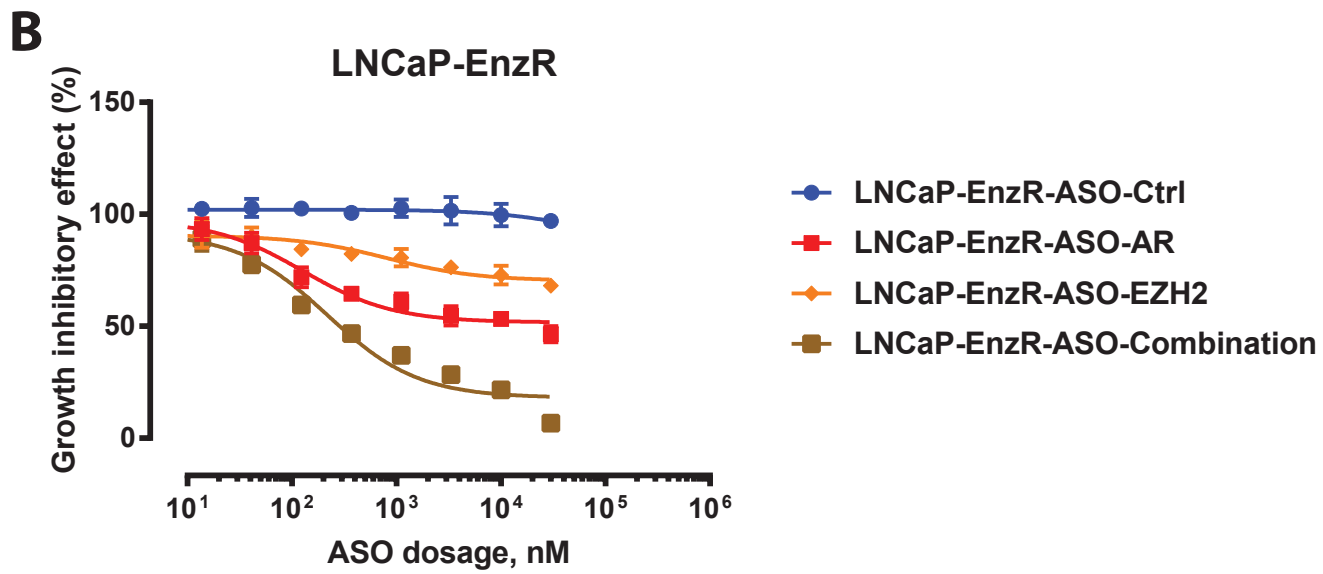

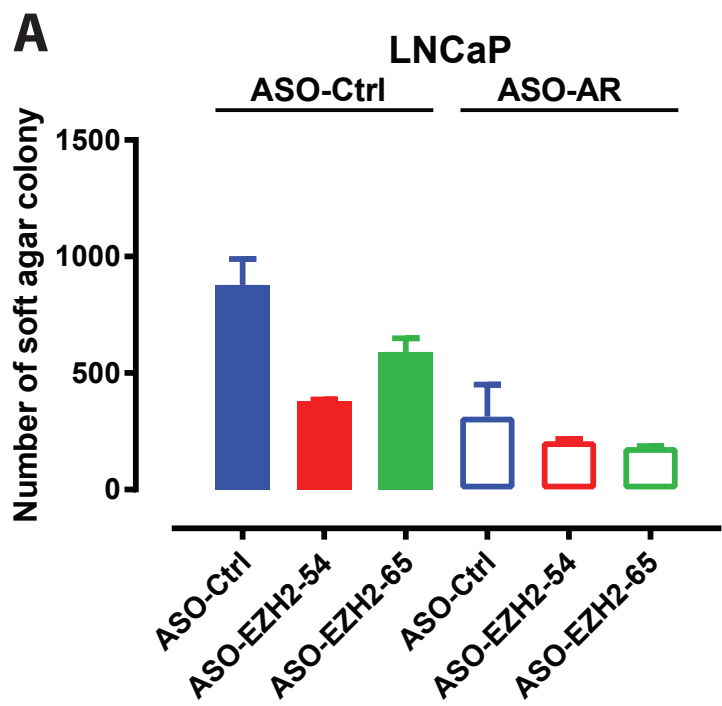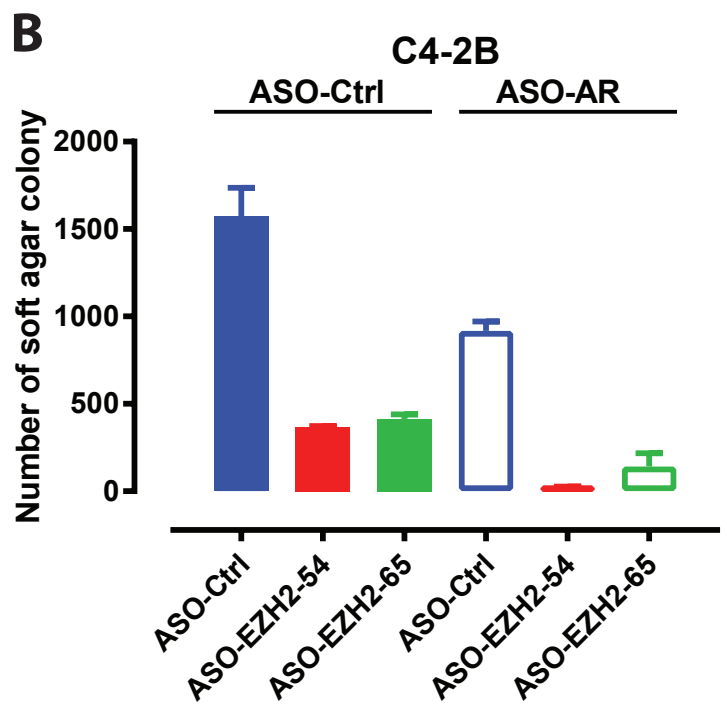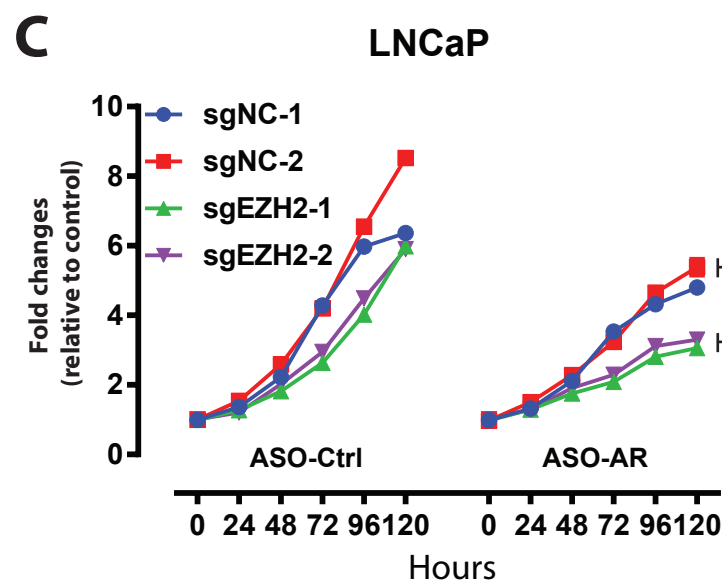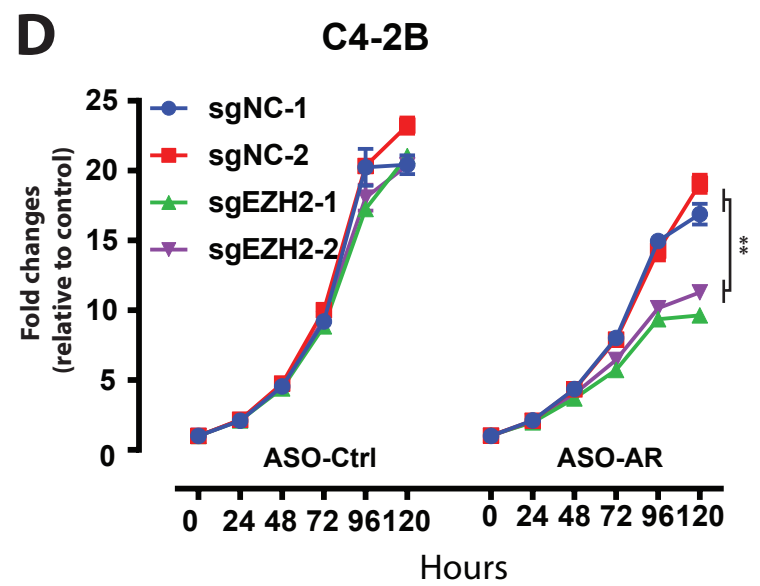

**A**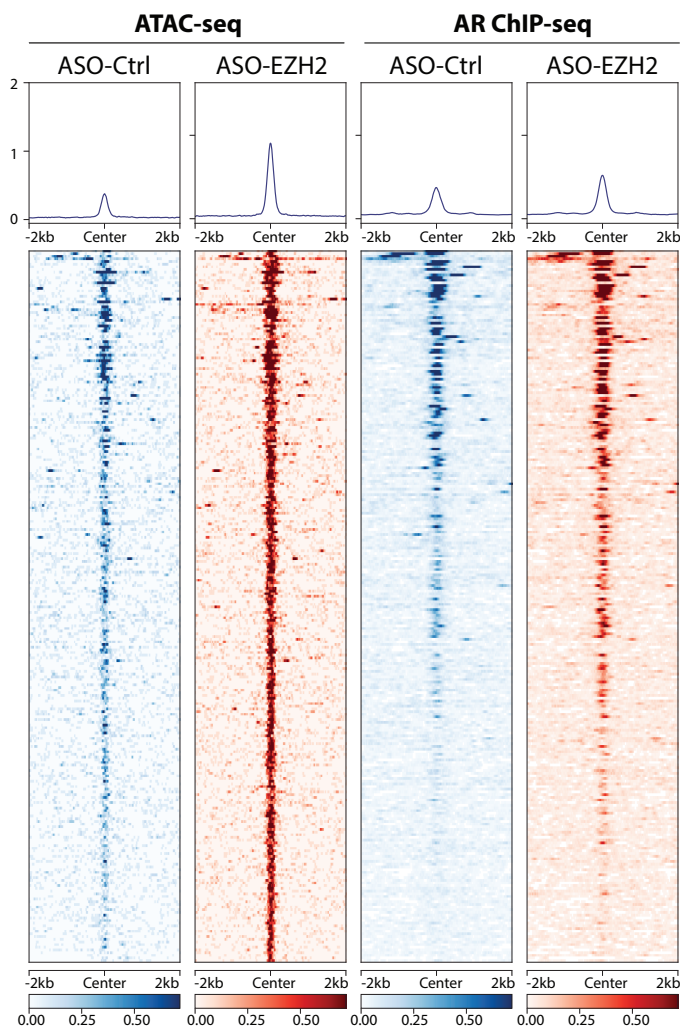**B**

Top five enriched motifs in DARs following EZH2 ASO treatment:

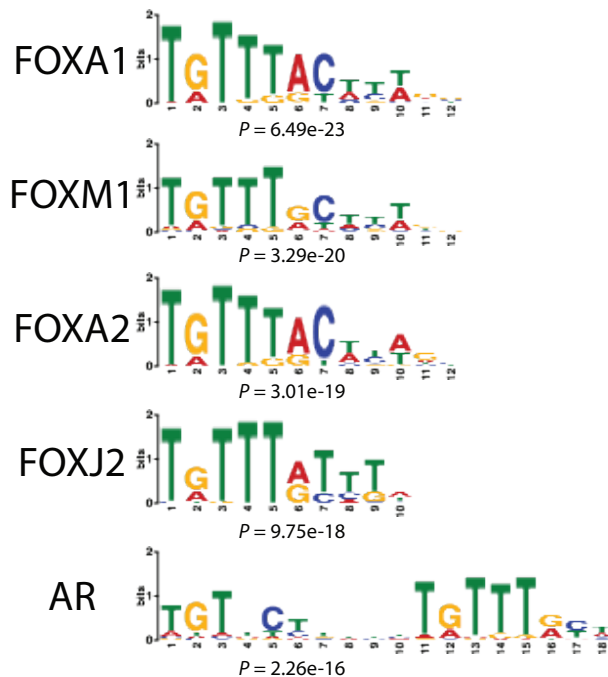**C**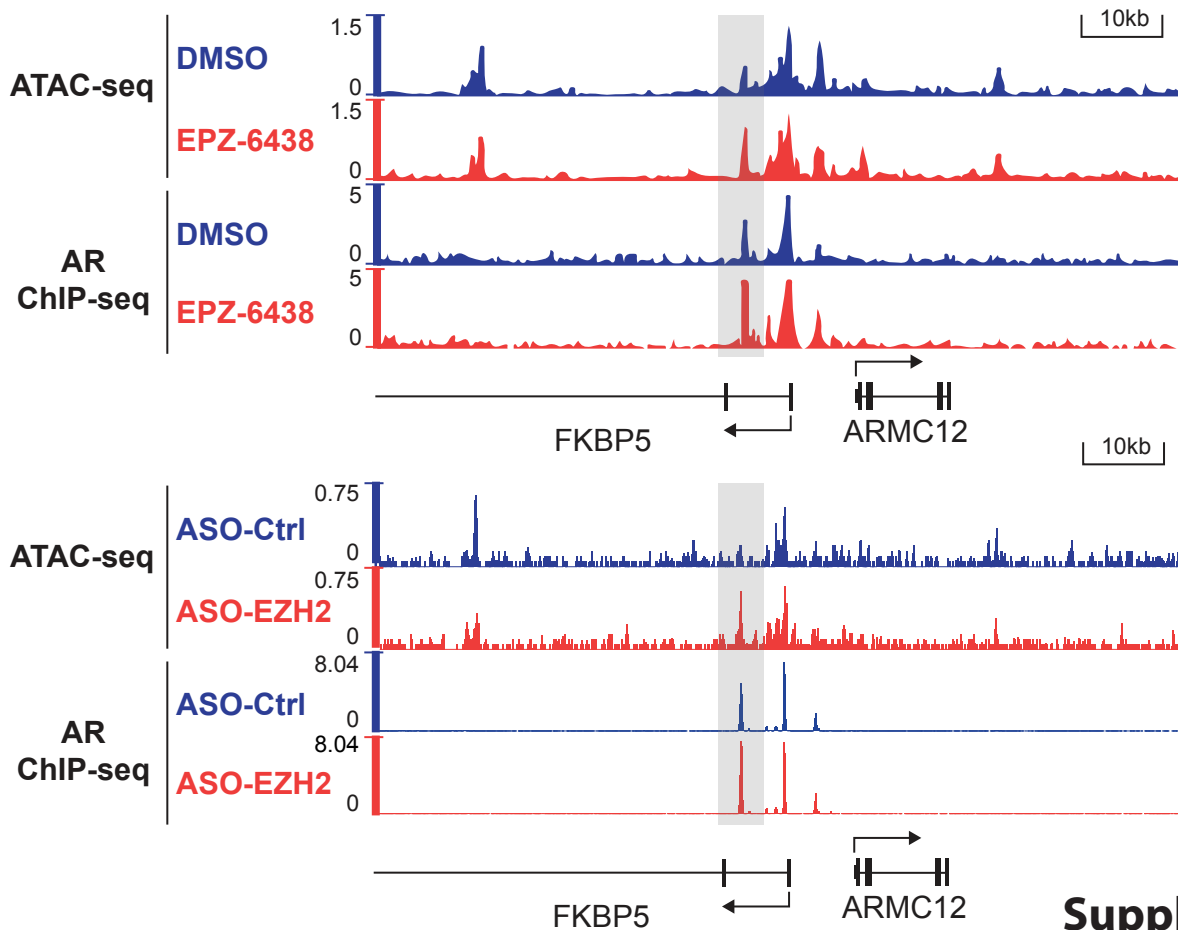

**A**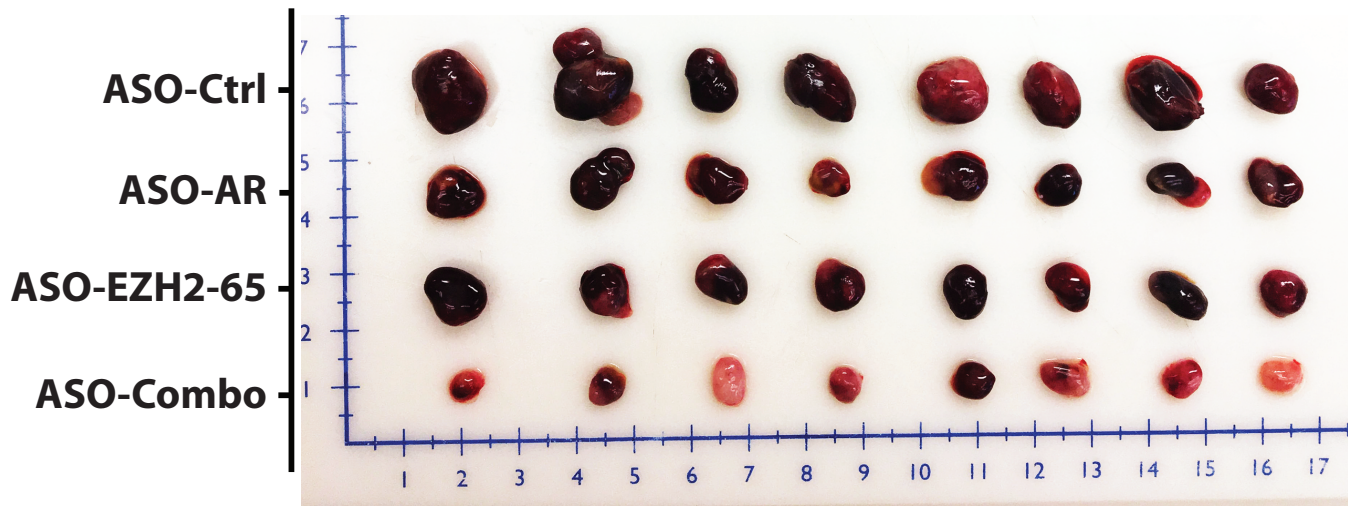**B**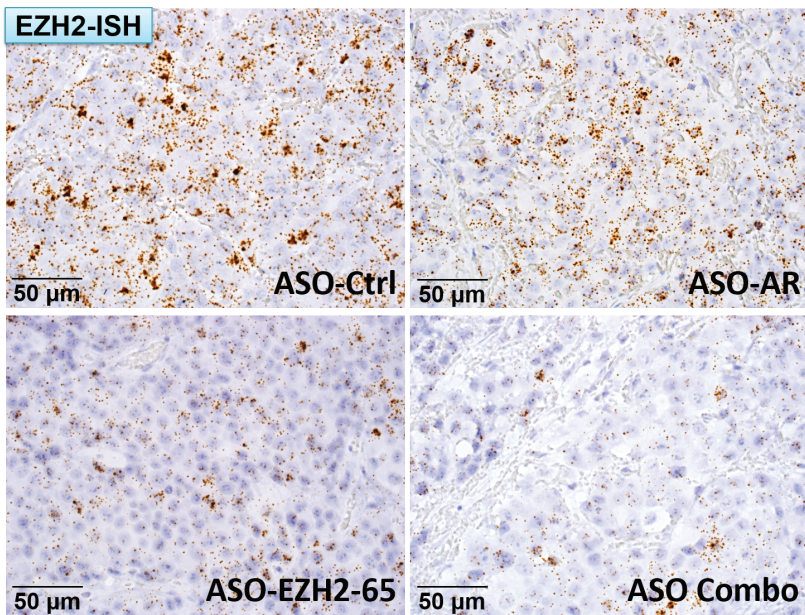**D**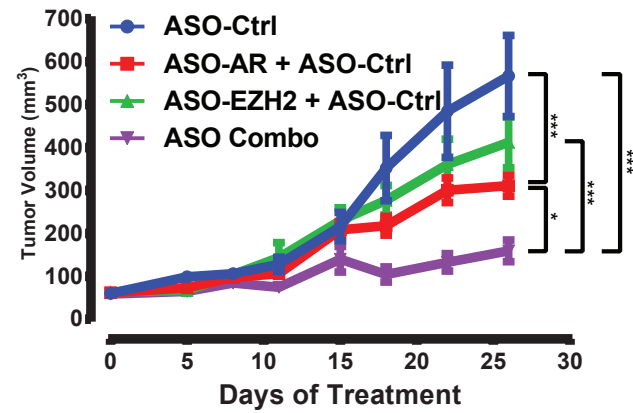**C**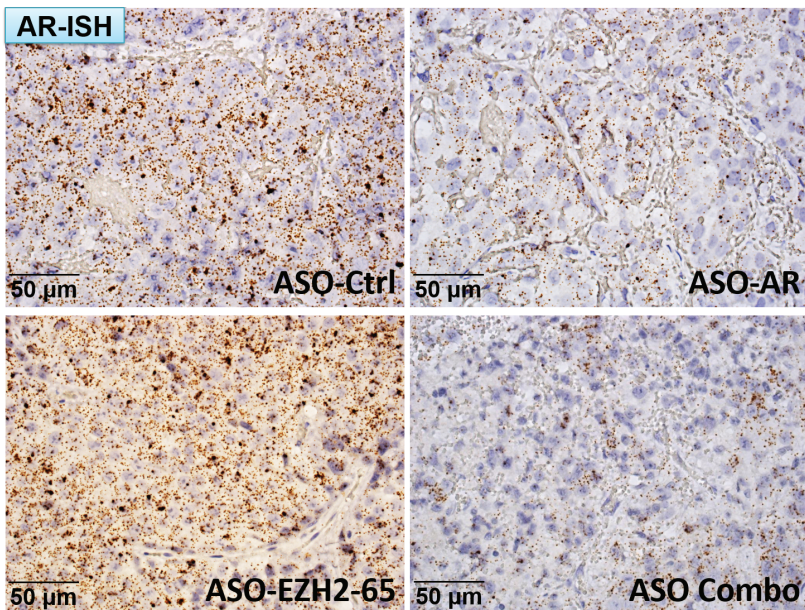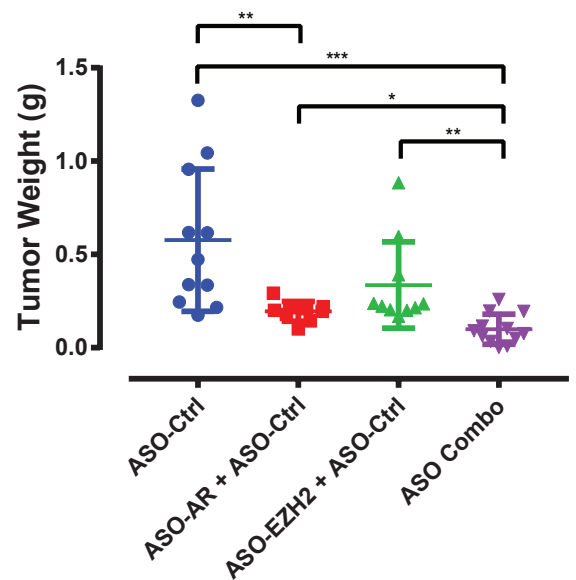

Supplement: NIHMS1504968-supplement-2.pdf [file NIHMS1504968-supplement-2.pdf]
